# Supplementary material for: Targeting of TGF-β-activated protein kinase 1 inhibits chemokine (C-C motif) receptor 7 expression, tumor growth and metastasis in breast cancer
Source: PubMed Central journal article supplement (PMC4359270; doi:10.18632/oncotarget.2739), 2014-12-10
Supplement: oncotarget-06-995-s001.pdf [file oncotarget-06-995-s001.pdf]

SUPPLEMENTARY FIGURES AND TABLE

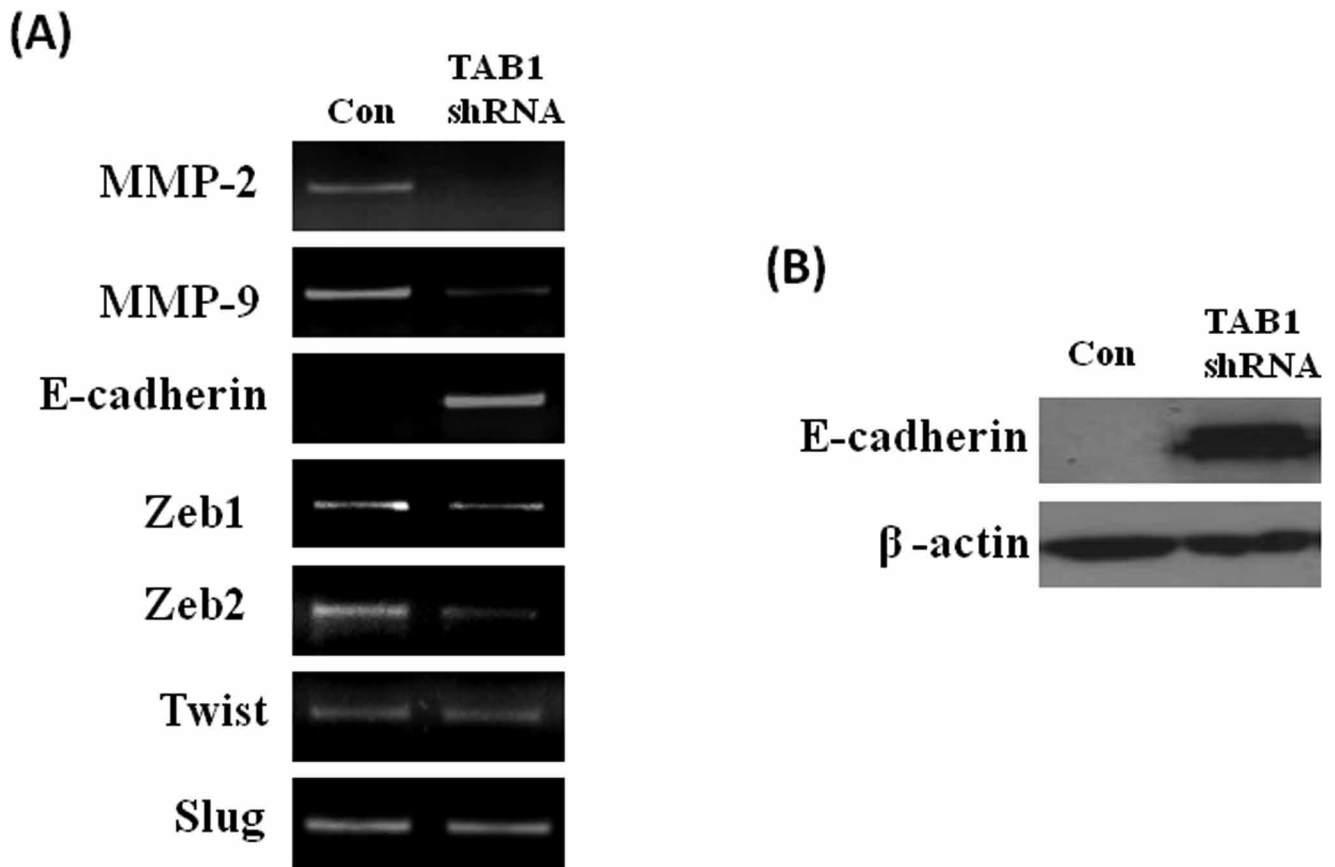

Supplementary Figure 1: Alteration of EMT regulators in TAB1-inhibited MDA-MB-231 cells.

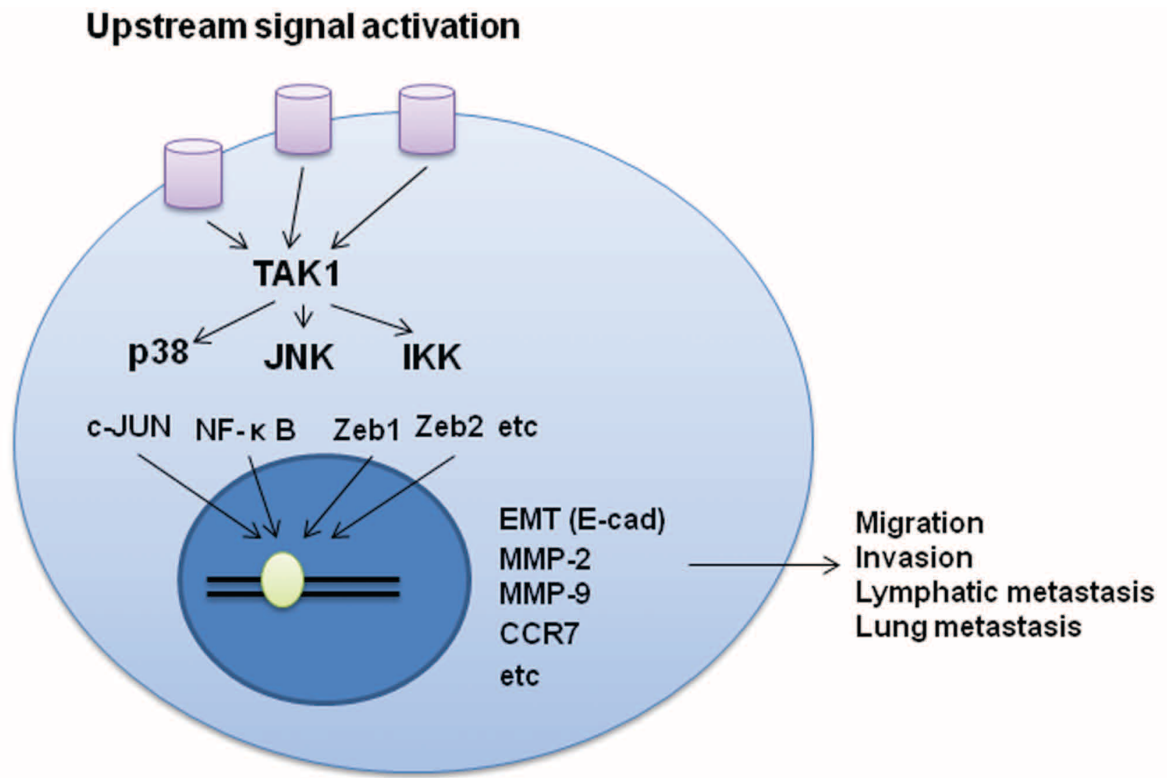

Supplementary Figure 2: Proposed mechanism of TAK 1-induced invasion and metastasis in breast cancer.

Supplemental Table 1: Microarray panel display

|   | 1   | 2   | 3   | 4   | 5   | 6   | 7   | 8   | 9   | 10  |
|---|-----|-----|-----|-----|-----|-----|-----|-----|-----|-----|
| A | Bre | Bre | Bre | Bre | Bre | Bre | Bre | Bre | Bre | Bre |
| B | Bre | Bre | Bre | Bre | Bre | Bre | Bre | Bre | Bre | Bre |
| C | Bre | Bre | Bre | Bre | Bre | Bre | Bre | Bre | Bre | Bre |
| D | Bre | Bre | Bre | Bre | Bre | Bre | Bre | Bre | Bre | Bre |
| E | Bre | Bre | Bre | Bre | Bre | Bre | Bre | Bre | Bre | Bre |
| F | Bre | Bre | Bre | Bre | Bre | Bre | Bre | Bre | Bre | Bre |
| G | Bre | Bre | Bre | Bre | Bre | Bre | Bre | Bre | Bre | Bre |
| H | Bre | Bre | Bre | Bre | Bre | Bre | Bre | Bre | Bre | Bre |

US Biomax, Inc.

**Legend:** Bre - Breast  
 ● - Malignant tumor, ● - Malignant tumor (stage I), ● - Malignant tumor (stage IIIa), ● - Malignant tumor (stage IIIb), ● - Malignant tumor (stage IIa), ● - Malignant tumor (stage IIb), ● - Malignant tumor (stage IV), ● - NAT, ● - Normal tissue

**Specification Sheet**

| Pos | No. | Sex | Age | Organ  | Pathology diagnosis                       | Grade | Stage | TNM     | Type †    |
|-----|-----|-----|-----|--------|-------------------------------------------|-------|-------|---------|-----------|
| A1  | 1   | F   | 41  | Breast | Invasive ductal carcinoma                 | 2     | I Ib  | T2N1M0  | Malignant |
| A2  | 2   | F   | 38  | Breast | Invasive ductal carcinoma                 | 1     | I     | T1cN0M0 | Malignant |
| A3  | 3   | F   | 55  | Breast | Invasive ductal carcinoma                 | 2     | I Ib  | T3N0M0  | Malignant |
| A4  | 4   | F   | 62  | Breast | Invasive ductal carcinoma                 | 2     | IV    | T4N2M1  | Malignant |
| A5  | 5   | F   | 35  | Breast | Invasive ductal carcinoma                 | 2     | IIIb  | T4N2M0  | Malignant |
| A6  | 6   | F   | 41  | Breast | Invasive ductal carcinoma                 | 1     | I Ib  | T3N0M0  | Malignant |
| A7  | 7   | F   | 75  | Breast | Invasive ductal carcinoma                 | 2     | I Ib  | T2N1M0  | Malignant |
| A8  | 8   | F   | 43  | Breast | Invasive ductal carcinoma (breast tissue) | -     | IIIb  | T4N2M0  | Malignant |
| A9  | 9   | F   | 32  | Breast | Invasive ductal carcinoma                 | 2     | I     | T1N0M0  | Malignant |
| A10 | 10  | F   | 47  | Breast | Invasive ductal carcinoma                 | 2     | IIa   | T2N0M0  | Malignant |
| B1  | 11  | F   | 60  | Breast | Invasive ductal carcinoma                 | 2     | I Ib  | T2N1M0  | Malignant |
| B2  | 12  | F   | 53  | Breast | Invasive ductal carcinoma                 | 2     | I Ib  | T3N0M0  | Malignant |
| B3  | 13  | F   | 48  | Breast | Invasive ductal carcinoma                 | 2     | IIIb  | T4N2M0  | Malignant |
| B4  | 14  | F   | 49  | Breast | Invasive ductal carcinoma                 | 2     | IIIb  | T4N1M0  | Malignant |
| B5  | 15  | F   | 40  | Breast | Invasive ductal carcinoma                 | 2     | IIa   | T2N0M0  | Malignant |
| B6  | 16  | F   | 45  | Breast | Invasive ductal carcinoma                 | 2     | I     | T1N0M0  | Malignant |
| B7  | 17  | F   | 51  | Breast | Invasive ductal carcinoma                 | 2     | I Ib  | T3N1M0  | Malignant |
| B8  | 18  | F   | 44  | Breast | Invasive ductal carcinoma                 | 1     | I Ib  | T2N1M0  | Malignant |
| B9  | 19  | F   | 53  | Breast | Invasive ductal carcinoma                 | 2     | I Ib  | T2N1M0  | Malignant |
| B10 | 20  | F   | 42  | Breast | Invasive ductal carcinoma                 | 2     | IIIb  | T3N0M0  | Malignant |
| C1  | 21  | F   | 38  | Breast | Invasive ductal carcinoma                 | 2     | IIa   | T2N0M0  | Malignant |
| C2  | 22  | F   | 43  | Breast | Invasive ductal carcinoma                 | 2     | I Ib  | T2N1M0  | Malignant |
| C3  | 23  | F   | 39  | Breast | Invasive ductal carcinoma                 | 2     | I Ib  | T2N1M0  | Malignant |
| C4  | 24  | F   | 53  | Breast | Invasive ductal carcinoma                 | 2     | IIa   | T2N0M0  | Malignant |
| C5  | 25  | F   | 50  | Breast | Invasive ductal carcinoma                 | 3     | I Ib  | T3N0M0  | Malignant |
| C6  | 26  | F   | 54  | Breast | Invasive ductal carcinoma                 | 2     | I Ib  | T2N1M0  | Malignant |

*(Continued)*

| Pos | No. | Sex | Age | Organ  | Pathology diagnosis                  | Grade | Stage | TNM     | Type †    |
|-----|-----|-----|-----|--------|--------------------------------------|-------|-------|---------|-----------|
| C7  | 27  | F   | 55  | Breast | Invasive ductal carcinoma            | 1-2   | I Ib  | T3N1M0  | Malignant |
| C8  | 28  | F   | 52  | Breast | Invasive ductal carcinoma            | 2     | IIIa  | T2N2M0  | Malignant |
| C9  | 29  | F   | 32  | Breast | Invasive ductal carcinoma            | 2     | I Ib  | T2N1M0  | Malignant |
| C10 | 30  | F   | 50  | Breast | Invasive ductal carcinoma            | 2     | I Ib  | T2N1M0  | Malignant |
| D1  | 31  | F   | 50  | Breast | Invasive ductal carcinoma            | 2     | I Ib  | T2N1M0  | Malignant |
| D2  | 32  | F   | 53  | Breast | Invasive ductal carcinoma            | 2     | I     | T1cN0M0 | Malignant |
| D3  | 33  | F   | 47  | Breast | Invasive ductal carcinoma            | 2     | I Ib  | T3N0M0  | Malignant |
| D4  | 34  | F   | 68  | Breast | Invasive ductal carcinoma (sparse)   | 2     | IV    | T4N2M1  | Malignant |
| D5  | 35  | F   | 45  | Breast | Invasive ductal carcinoma            | 2     | IIIb  | T4N2M0  | Malignant |
| D6  | 36  | F   | 40  | Breast | Invasive ductal carcinoma            | 2     | I Ib  | T3N0M0  | Malignant |
| D7  | 37  | F   | 47  | Breast | Invasive ductal carcinoma            | 2     | I Ib  | T2N1M0  | Malignant |
| D8  | 38  | F   | 57  | Breast | Invasive ductal carcinoma            | 2     | IIIb  | T4N2M0  | Malignant |
| D9  | 39  | F   | 54  | Breast | Invasive ductal carcinoma            | 2     | I     | T1N0M0  | Malignant |
| D10 | 40  | F   | 35  | Breast | Invasive ductal carcinoma            | 1-2   | IIa   | T2N0M0  | Malignant |
| E1  | 41  | F   | 19  | Breast | Invasive ductal carcinoma (sparse)   | 2     | I Ib  | T2N1M0  | Malignant |
| E2  | 42  | F   | 28  | Breast | Invasive ductal carcinoma            | 2     | IIa   | T1N1M0  | Malignant |
| E3  | 43  | F   | 38  | Breast | Invasive ductal carcinoma            | 3     | IIa   | T2N0M0  | Malignant |
| E4  | 44  | F   | 65  | Breast | Invasive ductal carcinoma            | 3     | IIIa  | T1N2M0  | Malignant |
| E5  | 45  | F   | 52  | Breast | Invasive ductal carcinoma            | 3     | I Ib  | T2N1M0  | Malignant |
| E6  | 46  | F   | 48  | Breast | Invasive ductal carcinoma            | 3     | I Ib  | T2N1M0  | Malignant |
| E7  | 47  | F   | 49  | Breast | Cancer adjacent normal breast tissue | -     | -     | -       | NAT       |
| E8  | 48  | F   | 41  | Breast | Invasive ductal carcinoma            | 3     | IIIa  | T3N1M0  | Malignant |
| E9  | 49  | F   | 48  | Breast | Invasive ductal carcinoma            | 3     | IV    | T2N1M1  | Malignant |
| E10 | 50  | F   | 44  | Breast | Invasive ductal carcinoma            | 3     | IIa   | T2N0M0  | Malignant |
| F1  | 51  | F   | 59  | Breast | Invasive ductal carcinoma            | 3     | IIa   | T2N0M0  | Malignant |
| F2  | 52  | F   | 61  | Breast | Ductal-lobular mixed carcinoma       | -     | I Ib  | T2N1M0  | Malignant |
| F3  | 53  | F   | 38  | Breast | Ductal-lobular mixed carcinoma       | -     | IIa   | T2N0M0  | Malignant |
| F4  | 54  | F   | 46  | Breast | Ductal-lobular                       | -     | IIa   | T2N0M0  | Malignant |

(Continued)

| Pos | No. | Sex | Age | Organ  | Pathology diagnosis                      | Grade | Stage | TNM     | Type †    |
|-----|-----|-----|-----|--------|------------------------------------------|-------|-------|---------|-----------|
|     |     |     |     |        | mixed carcinoma                          |       |       |         |           |
| F5  | 55  | F   | 46  | Breast | Ductal-lobular mixed carcinoma           | -     | IIIb  | T4N0M0  | Malignant |
| F6  | 56  | F   | 46  | Breast | Invasive lobular carcinoma (adenosis)    | -     | IIa   | T2N0M0  | Malignant |
| F7  | 57  | F   | 49  | Breast | Invasive lobular carcinoma               | -     | IIa   | T2N0M0  | Malignant |
| F8  | 58  | F   | 38  | Breast | Invasive lobular carcinoma (sparse)      | -     | IIb   | T2N1M0  | Malignant |
| F9  | 59  | F   | 34  | Breast | Invasive lobular carcinoma               | -     | IIa   | T2N0M0  | Malignant |
| F10 | 60  | F   | 41  | Breast | Invasive lobular carcinoma               | -     | IIIa  | T2N2M0  | Malignant |
| G1  | 61  | F   | 43  | Breast | Invasive lobular carcinoma               | -     | IIa   | T2N0M0  | Malignant |
| G2  | 62  | F   | 56  | Breast | Invasive lobular carcinoma               | -     | IIa   | T2N0M0  | Malignant |
| G3  | 63  | F   | 40  | Breast | Invasive lobular carcinoma               | -     | IIb   | T2N1M0  | Malignant |
| G4  | 64  | F   | 40  | Breast | Medullary carcinoma                      | -     | IIIa  | T2N2NM0 | Malignant |
| G5  | 65  | F   | 43  | Breast | Medullary carcinoma                      | -     | IIa   | T2N0M0  | Malignant |
| G6  | 66  | F   | 48  | Breast | Medullary carcinoma                      | -     | IIIb  | T4N0M0  | Malignant |
| G7  | 67  | F   | 31  | Breast | Medullary carcinoma                      | -     | IIa   | T2N0M0  | Malignant |
| G8  | 68  | F   | 72  | Breast | Medullary carcinoma                      | -     | IIa   | T2N0M0  | Malignant |
| G9  | 69  | F   | 40  | Breast | Medullary carcinoma                      | -     | IIa   | T2N0M0  | Malignant |
| G10 | 70  | F   | 47  | Breast | Medullary carcinoma                      | -     | IIa   | T2N0M0  | Malignant |
| H1  | 71  | F   | 55  | Breast | Medullary carcinoma                      | -     | IIa   | T2N0M0  | Malignant |
| H2  | 72  | F   | 47  | Breast | Cancer adjacent normal breast tissue     | -     | -     | -       | NAT       |
| H3  | 73  | F   | 43  | Breast | Cancer adjacent normal breast tissue     | -     | -     | -       | NAT       |
| H4  | 74  | F   | 42  | Breast | Cancer adjacent normal breast tissue     | -     | -     | -       | NAT       |
| H5  | 75  | F   | 53  | Breast | Cancer adjacent normal breast tissue     | -     | -     | -       | NAT       |
| H6  | 76  | F   | 18  | Breast | Normal breast tissue (fibrofatty tissue) | -     | -     | -       | Normal    |
| H7  | 77  | F   | 19  | Breast | Normal breast tissue                     | -     | -     | -       | Normal    |
| H8  | 78  | F   | 35  | Breast | Normal breast tissue                     | -     | -     | -       | Normal    |
| H9  | 79  | F   | 50  | Breast | Normal breast tissue                     | -     | -     | -       | Normal    |
| H10 | 80  | F   | 27  | Breast | Normal breast tissue                     | -     | -     | -       | Normal    |

(Continued)

| Pos | No. | Sex | Age | Organ | Pathology diagnosis                | Grade | Stage | TNM | Type †    |
|-----|-----|-----|-----|-------|------------------------------------|-------|-------|-----|-----------|
| -   | -   | M   | 58  | Skin  | Malignant melanoma (tissue marker) | -     |       |     | Malignant |

\*\*The grade 1-3 (or I-III) in Pathology Diagnosis is equivalent to well-differentiated, moderately-differentiated or poorly differentiated, respectively, under microscope.

**Grade 1 or well-differentiated:** Cells appear normal and are not growing rapidly.

**Grade 2 or moderately-differentiated:** Cells appear slightly different than normal.

**Grade 3 or poorly differentiated:** Cells appear abnormal and tend to grow and spread more aggressively.

**Grade 4 or undifferentiated:** \*(for certain tumors), features are not significantly distinguishing to make it look any different from undifferentiated cancers which occur in other organs.

### TNM grading:

#### T - Primary tumor

Tx - Primary tumor cannot be assessed

T0 - No evidence of primary tumor

Tis - Carcinoma in situ; intraepithelial or invasion of lamina propria

T1 - Tumor invades submucosa

T2 - Tumor invades muscularis propria

T3 - Tumor invades through muscularis propria into subserosa or into non-peritonealized pericolic or perirectal tissues.

T4 - Tumor directly invades other organs or structures and/or perforate visceral peritoneum

#### N - Regional lymph nodes

Nx - Regional lymph nodes cannot be assessed

N0 - No regional lymph node metastasis

N1 - Metastasis in 1 to 3 regional lymph nodes

N2 - Metastasis in 4 or more regional lymph nodes

#### M - Distant metastasis

Mx - Distant metastasis cannot be assessed

M0 - No distant metastasis

M1 - Distant metastasis
